# Supplementary material for: Investigation of dirigent like domains from bacterial genomes
Source: Research Square preprint supplement (doi:10.21203/rs.3.rs-1488375/v1), 2022-04-08
Supplement: Supplementary file 1 [file e65153675635eb32b5560732.xlsx]

## Sheet: Feuil1
n°	Specie	Gram	Accession number DP like	Size (AA)	Identity % AtDIR6 (clustalW)	Similarity % AtDIR6	peptide signal size (AA)	S-S bridge prediction position/probability Score
1	Streptomyces sp. Root1304	+	A0A0T1SRD5	166	0.219	0.302	29	(14-98) 0.13
2	Streptomyces sp. PanSC19	+	A0A3N1Q171	167	0.215	0.269	30	(12-14) 0.02 / (85-99) 0.01
3	Streptomyces sp. 62	+	A0A3D9LXQ3	167	0.215	0.325	30	(85-99) 0.01
4	Sphaerobacter thermophilus strain DSM 20745	+	D1C1V3	173	0.207	0.345	36	(155-169) 0.0119
5	Kutzneria albida DSM 43870	+	W5WKJ3	164	0.205	0.283	34
6	Streptomyces vietnamensis GIMV4.0001	+	A0A0B5I9B2	160	0.201	0.286	32	(13-101) 0.99
7	Streptomyces viridochromogenes	+	A0A0L8K704	166	0.195	0.274	29	(84-98) 0.01
8	Cystobacter fuscus DSM 52655	-	A0A250IWY0	154	0.195	0.394	27	(81-92) 0.99
9	Streptomyces bottropensis ATCC 25435	+	M3F484	161	0.19	0.3	29	(17-100) 0.02
10	Nocardioides iriomotensis NBRC 105384	+	A0A4Q5J010	152	18.80%	0.319	24	(81-92) 0.18
11	Methylomicrobium alcaliphilum	-	G4T3L1	147	0.187	0.31	19	(27-87) 0.94
12	Archangium violaceum Cb vi76	-	A0A084SGS8	148	0.186	0.322	21	(75-86) 0.99
13	Chloroflexi bacterium GWC2_73_18	-	A0A1F8LMI0	155	0.181	0.306	25	(82-93) 0.01
14	Nocardia mexicana DSM 44952	+	A0A370GIR3	161	0.179	29.9%	35	(87-101) 0.01
15	Gammaproteobacteria bacterium HGW	-	A0A2N1ZX47	146	0.177	0.296	18	(12-19) 0.11/(75-86) 0.01
16	Cystobacter fuscus DSM 2262	-	S9NWQ1	137	0.176	0.271	ND	(64-75) 0.99
17	Archangium gephyra	-	A0A0L8K704	151	0.173	0.271	19	(78-89) 0.99
18	Cystobacter ferrugineus str. Cbfe23	-	A0A1L9B5J6	137	0.173	0.269	ND	(64-75) 0.99
19	Streptomyces sp. SA15	+	A0A2A2YWR6	206	0.17	0.327	30	(106-118) 0.01
20	Stigmatella erecta	-	A0A1I0JK20	162	0.168	0.252	ND	(89-100) 0.99
21	Streptomyces alboflavus str. MDJK44	+	A0A1Z1WCN3	163	0.168	0.318	27
22	Streptomyces sp. NWU339	+	A0A2U2Z012	205	0.165	0.322	30	(105-112) 0.99
23	Streptomyces formicae KY5	+	A0A291Q4S1	163	0.162	0.276	33	(13-72) 0.01
24	Streptomyces sp. CB02400	+	A0A1Q5L121	205	0.161	0.277	30	(105-117) 0.01
25	Streptomyces caelestis	+	A0A0M8QLY2	205	0.161	0.27	30	(105-117) 0.01
26	Pseudonocardiales bacterium YIM PH 21723	+	A0A2W6DT35	168	0.16	0.283	33	(96-109) 0.01
27	Methylomicrobium kenyense (AMO1)	-	A0A543V9V5	149	0.158	0.265	ND	(5-16) 0.01/(76-148) 0.10/(87-123) 0.01
28	Streptomyces griseoruber str. DSM 40281	+	A0A101SV50	161	0.158	0.254	29	(89-100) 0.84
29	Chloroflexi bacterium	-	A0A3A0ARB1	201	0.157	0.273	27	(21-112) 0.01
30	Thiogranum longum str. DSM 19610	-	A0A4R1H9Y2	148	0.157	0.253	21	(3-87) 0.01/ (11-13) 0.01/ (20-76) 0.99
31	Streptomyces fungicidicus str. TXX3120	+	A0A494UTW6	205	0.154	0.278	ND	(18-105) 0.01
32	Streptomyces toyocaensis str. NRRL 15009	+	A0A081XHD4	205	0.152	0.29	30	(105-117) 0.87
33	Streptomyces showdoensis ATCC 15227	+	A0A2P2GJ53	167	0.151	0.211	29	(86-99) 0.95
34	Enterobacter ludwigii str. P101	-	W0BV16	154	0.149	0.22	19	(83-94) 0.24
35	Stigmatella aurantiaca	-	A0A1H7HD66	162	0.149	0.246	35	(19-30) 0.99/(89-100) 0.99
36	Modestobacter sp. DSM 44400	+	A0A1H3KGG2	123	0.148	0.254	ND	(41-52) 0.01
37	Streptomyces radiopugnans	+	A0A1H9DCJ1	205	0.148	0.27	32	(105-117) 0.01
38	Methylomicrobium buryatense str. 5GB1C	-	A0A4P9UY52	131	0.148	0.261	ND	(4-60) 0.01/ (7-71) 0.01
39	Vitiosangium sp. GDMCC 1.1324	-	A0A2T4VJB7	146	0.146	0.25	ND	(74-85) 0.99
40	Archangium sp. Cb G35	-	A0A1Q3H6L3	145	0.145	0.229	ND	(72-83) 0.99
41	Cellulomonas aerilata	+	A0A512DF30	174	0.144	0.245	24	(99-115) 0.01
42	Streptomyces sp. NRRL S-4	+	A0A0N1K8E7	203	0.143	0.251	30	(105-117) 0.01
43	Streptomyces silvensis ATCC 53525	+	A0A0W7X1T4	166	0.139	0.26	33	(13-75) 0.01
44	Streptomyces sp. CNZ306	+	A0A2M9A2V5	258	0.138	0.273	ND	(158-170) 0.01
45	Streptomyces dysideae sp. RV15	+	A0A124IFP4	187	0.132	0.226	36	(112-124) 0.06
46	Streptomyces regalis	+	A0A0X3UWY4	122	0.125	0.179	ND	(47-59) 0.01
47	Streptomyces sp. 13-12-16	+	A0A1X4I170	205	0.124	0.241	30	(105-117) 0.01
48	Streptoalloteichus hindustanus	+	A0A1M5GN54	161	0.121	0.222	31	(87-101) 0.01
49	Hyalangium minutum	-	A0A085VSV8	96	0.117	0.203	ND	(23-34) 0.95

## Sheet: Feuil4
n°	Specie	Gram	UniprotAccession number DIRL	Secondary metabolism clusters	Size (AA)	Identity % AtDIR6 (clustalW)	Similarity % AtDIR6	peptide signal size (AA)	S-S bridge prediction position/probability Score by AlphaFold	N-Glycosylation prediction in prokaryotes via Glycopp avec score >0,8	Bacterial Family number
1	Streptomyces sp. Root1304	+	A0A0T1SRD5	23	166	0.219	0.302	29	84-98	0	I
2	Streptomyces sp. PanSC19	+	A0A3N1Q171	22	167	0.215	0.269	30	85-99	0	I
3	Streptomyces sp. 62	+	A0A3D9LXQ3	29	167	0.215	0.325	30	85-99	0	i
4	Sphaerobacter thermophilus strain DSM 20745	+	D1C1V3	1	173	0.207	0.345	36	155-169	0	NO
5	Kutzneria albida DSM 43870	+	W5WKJ3	46	164	0.205	0.283	34	no S-S bridge	0	NO
6	Streptomyces vietnamensis GIMV4.0001	+	A0A0B5I9B2	28	160	0.201	0.286	32	87-101	0	i
7	Streptomyces viridochromogenes	+	A0A0L8K704	0	166	0.195	0.274	29	84-98	0	i
8	Cystobacter fuscus DSM 52655	-	A0A250IWY0	47	154	0.195	0.394	27	81-92	0	IV
9	Streptomyces bottropensis ATCC 25435	+	M3F484	30	161	0.19	0.3	29	89-100	0	NO
10	Nocardioides iriomotensis NBRC 105384	+	A0A4Q5J010	5	152	0.19	0.319	24	91-92	0	NO
11	Methylomicrobium alcaliphilum	-	G4T3L1	9	147	0.187	0.31	19	76-87	0	iii
12	Archangium violaceum Cb vi76	-	A0A084SGS8	0	148	0.186	0.322	21	75-86	0	IV
13	Chloroflexi bacterium GWC2_73_18	-	A0A1F8LMI0	1	155	0.181	0.306	25	82-93	0	NO
14	Nocardia mexicana DSM 44952	+	A0A370GIR3	38	161	0.179	0.29	35	87-101	0	NO
15	Gammaproteobacteria bacterium HGW	-	A0A2N1ZX47	10	146	0.177	0.296	18	75-86	0	III
16	Cystobacter fuscus DSM 2262	-	S9NWQ1	44	137	0.176	0.271	ND	64-75	0	IV
17	Archangium gephyra	-	A0A0L8K704	41	151	0.173	0.271	19	78-89	0	IV
18	Cystobacter ferrugineus str. Cbfe23	-	A0A1L9B5J6	41	137	0.173	0.269	ND	64-75	0	IV
19	Streptomyces sp. SA15	+	A0A2A2YWR6	51	206	0.17	0.327	30	106-118	0	V
20	Stigmatella erecta	-	A0A1I0JK20	29	162	0.168	0.252	ND	89-100	0	IV
21	Streptomyces alboflavus str. MDJK44	+	A0A1Z1WCN3	29	163	0.168	0.318	27	no S-S bridge	0	II
22	Streptomyces sp. NWU339	+	A0A2U2Z012	32	205	0.165	0.322	30	105-112	0	V
23	Streptomyces formicae KY5	+	A0A291Q4S1	45	163	0.162	0.276	33	no S-S bridge	0	II
24	Streptomyces sp. CB02400	+	A0A1Q5L121	33	205	0.161	0.277	30	105-117	0	V
25	Streptomyces caelestis	+	A0A0M8QLY2	42	205	0.161	0.27	30	105-117	0	V
26	Pseudonocardiales bacterium YIM PH 21723	+	A0A2W6DT35	4	168	0.16	0.283	33	96-109	0	NO
27	Methylomicrobium kenyense (AMO1)	-	A0A543V9V5	7	149	0.158	0.265	ND	2 S-S bridges:76-148/87/123	0	III
28	Streptomyces griseoruber str. DSM 40281	+	A0A101SV50	36	161	0.158	0.254	29	89-100	0	NO
29	Chloroflexi bacterium	-	A0A3A0ARB1	9	201	0.157	0.273	27	only one Cys	0	NO
30	Thiogranum longum str. DSM 19610	-	A0A4R1H9Y2	3	148	0.157	0.253	21	76-87	0	III
31	Streptomyces fungicidicus str. TXX3120	+	A0A494UTW6	17	205	0.154	0.278	ND	104-116	0	V
32	Streptomyces toyocaensis str. NRRL 15009	+	A0A081XHD4	28	205	0.152	0.29	30	105-117	0	V
33	Streptomyces showdoensis ATCC 15227	+	A0A2P2GJ53	29	167	0.151	0.211	29	86-99	0	I
34	Enterobacter ludwigii str. P101	-	W0BV16	6	154	0.149	0.22	19	83-94	0	NO
35	Stigmatella aurantiaca	-	A0A1H7HD66	28	162	0.149	0.246	35	89-100	0	IV
36	Modestobacter sp. DSM 44400	+	A0A1H3KGG2	5	123	0.148	0.254	ND	41-52	0	NO
37	Streptomyces radiopugnans	+	A0A1H9DCJ1	2	205	0.148	0.27	32	105-117	0	V
38	Methylomicrobium buryatense str. 5GB1C	-	A0A4P9UY52	9	131	0.148	0.261	ND	no S-S bridge	0	III
39	Vitiosangium sp. GDMCC 1.1324	-	A0A2T4VJB7	56	146	0.146	0.25	ND	74-85	0	IV
40	Archangium sp. Cb G35	-	A0A1Q3H6L3	48	145	0.145	0.229	ND	72-83	0	IV
41	Cellulomonas aerilata	+	A0A512DF30	3	174	0.144	0.245	24	99-115	0	NO
42	Streptomyces sp. NRRL S-4	+	A0A0N1K8E7	43	203	0.143	0.251	30	105-117	0	V
43	Streptomyces silvensis ATCC 53525	+	A0A0W7X1T4	50	166	0.139	0.26	33	no S-S bridge	0	II
44	Streptomyces sp. CNZ306	+	A0A2M9A2V5	7	258	0.138	0.273	ND	158-170	0	V
45	Streptomyces dysideae sp. RV15	+	A0A124IFP4	32	187	0.132	0.226	36	112-124	0	V
46	Streptomyces regalis	+	A0A0X3UWY4	41	122	0.125	0.179	ND	47-59	0	V
47	Streptomyces sp. 13-12-16	+	A0A1X4I170	42	205	0.124	0.241	30	105-117	0	V
48	Streptoalloteichus hindustanus	+	A0A1M5GN54	31	161	0.121	0.222	31	87-101	0	V
49	Hyalangium minutum	-	A0A085VSV8	34	96	0.117	0.203	ND	no S-S bridge	0	IV
Table S1: Summary of information on the 48 bacteria having a DIRL protein. 2021 additions to the list published by Dabravolski in 2020 are highlighted in yellow. Operon structures are underlined.
	DIRLs belonging to a predicted operon structure are underlined.

## Sheet: Feuil3
Specie	Gram type	Accession number DP like	Size (AA)	Identity % AtDIR6 (clustalW)	Similarity % AtDIR6	peptide signal size (AA)	S-S bridge prediction position/probability Score
Streptomyces sp. Root1304	+	A0A0T1SRD5	166	0.219	0.302	29	(14-98) 0.13
Streptomyces sp. PanSC19	+	A0A3N1Q171	167	0.215	0.269	30	(12-14) 0.02 / (85-99) 0.01
Streptomyces sp. 62	+	A0A3D9LXQ3	167	0.215	0.325	30	(85-99) 0.01
Sphaerobacter thermophilus strain DSM 20745	+	D1C1V3	173	0.207	0.345	36	(155-169) 0.0119
Kutzneria albida DSM 43870	+	W5WKJ3	164	0.205	0.283	34
Streptomyces vietnamensis GIMV4.0001	+	A0A0B5I9B2	160	0.201	0.286	32	(13-101) 0.99
Streptomyces viridochromogenes	+	A0A0L8K704	166	0.195	0.274	29	(84-98) 0.01
Cystobacter fuscus DSM 52655	-	A0A250IWY0	154	0.195	0.394	27	(81-92) 0.99
Streptomyces bottropensis ATCC 25435	+	M3F484	161	0.19	0.3	29	(17-100) 0.02
Nocardioides iriomotensis NBRC 105384	+	A0A4Q5J010	152	18.80%	0.319	24	(81-92) 0.18
Methylomicrobium alcaliphilum	-	G4T3L1	147	0.187	0.31	19	(27-87) 0.94
Archangium violaceum Cb vi76	-	A0A084SGS8	148	0.186	0.322	21	(75-86) 0.99
Chloroflexi bacterium GWC2_73_18	-	A0A1F8LMI0	155	0.181	0.306	25	(82-93) 0.01
Nocardia mexicana DSM 44952	+	A0A370GIR3	161	0.179	29.9%	35	(87-101) 0.01
Gammaproteobacteria bacterium HGW	-	A0A2N1ZX47	146	0.177	0.296	18	(12-19) 0.11/(75-86) 0.01
Cystobacter fuscus DSM 2262	-	S9NWQ1	137	0.176	0.271	ND	(64-75) 0.99
Archangium gephyra	-	A0A0L8K704	151	0.173	0.271	19	(78-89) 0.99
Cystobacter ferrugineus str. Cbfe23	-	A0A1L9B5J6	137	0.173	0.269	ND	(64-75) 0.99
Streptomyces sp. SA15	+	A0A2A2YWR6	206	0.17	0.327	30	(106-118) 0.01
Stigmatella erecta	-	A0A1I0JK20	162	0.168	0.252	ND	(89-100) 0.99
Streptomyces alboflavus str. MDJK44	+	A0A1Z1WCN3	163	0.168	0.318	27
Streptomyces sp. NWU339	+	A0A2U2Z012	205	0.165	0.322	30	(105-112) 0.99
Streptomyces formicae KY5	+	A0A291Q4S1	163	0.162	0.276	33	(13-72) 0.01
Streptomyces sp. CB02400	+	A0A1Q5L121	205	0.161	0.277	30	(105-117) 0.01
Streptomyces caelestis	+	A0A0M8QLY2	205	0.161	0.27	30	(105-117) 0.01
Pseudonocardiales bacterium YIM PH 21723	+	A0A2W6DT35	168	0.16	0.283	33	(96-109) 0.01
Methylomicrobium kenyense (AMO1)	-	A0A543V9V5	149	0.158	0.265	ND	(5-16) 0.01/(76-148) 0.10/(87-123) 0.01
Streptomyces griseoruber str. DSM 40281	+	A0A101SV50	161	0.158	0.254	29	(89-100) 0.84
Chloroflexi bacterium	-	A0A3A0ARB1	201	0.157	0.273	27	(21-112) 0.01
Thiogranum longum str. DSM 19610	-	A0A4R1H9Y2	148	0.157	0.253	21	(3-87) 0.01/ (11-13) 0.01/ (20-76) 0.99
Streptomyces fungicidicus str. TXX3120	+	A0A494UTW6	205	0.154	0.278	ND	(18-105) 0.01
Streptomyces toyocaensis str. NRRL 15009	+	A0A081XHD4	205	0.152	0.29	30	(105-117) 0.87
Streptomyces showdoensis ATCC 15227	+	A0A2P2GJ53	167	0.151	0.211	29	(86-99) 0.95
Enterobacter ludwigii str. P101	-	W0BV16	154	0.149	0.22	19	(83-94) 0.24
Stigmatella aurantiaca	-	A0A1H7HD66	162	0.149	0.246	35	(19-30) 0.99/(89-100) 0.99
Modestobacter sp. DSM 44400	+	A0A1H3KGG2	123	0.148	0.254	ND	(41-52) 0.01
Streptomyces radiopugnans	+	A0A1H9DCJ1	205	0.148	0.27	32	(105-117) 0.01
Methylomicrobium buryatense str. 5GB1C	-	A0A4P9UY52	131	0.148	0.261	ND	(4-60) 0.01/ (7-71) 0.01
Vitiosangium sp. GDMCC 1.1324	-	A0A2T4VJB7	146	0.146	0.25	ND	(74-85) 0.99
Archangium sp. Cb G35	-	A0A1Q3H6L3	145	0.145	0.229	ND	(72-83) 0.99
Cellulomonas aerilata	+	A0A512DF30	174	0.144	0.245	24	(99-115) 0.01
Streptomyces sp. NRRL S-4	+	A0A0N1K8E7	203	0.143	0.251	30	(105-117) 0.01
Streptomyces silvensis ATCC 53525	+	A0A0W7X1T4	166	0.139	0.26	33	(13-75) 0.01
Streptomyces sp. CNZ306	+	A0A2M9A2V5	258	0.138	0.273	ND	(158-170) 0.01
Streptomyces dysideae sp. RV15	+	A0A124IFP4	187	0.132	0.226	36	(112-124) 0.06
Streptomyces regalis	+	A0A0X3UWY4	122	0.125	0.179	ND	(47-59) 0.01
Streptomyces sp. 13-12-16	+	A0A1X4I170	205	0.124	0.241	30	(105-117) 0.01
Streptoalloteichus hindustanus	+	A0A1M5GN54	161	0.121	0.222	31	(87-101) 0.01
Hyalangium minutum	-	A0A085VSV8	96	0.117	0.203	ND	(23-34) 0.95

## Sheet: Feuil2
Specie	Gram	Accession number DP like	Size (AA)	Identity % AtDIR6 (clustalW)	Similarity % AtDIR6	peptide signal size (AA)
Streptomyces sp. Root1304	+	A0A0T1SRD5	166	0.219	0.302	29
Streptomyces sp. PanSC19	+	A0A3N1Q171	167	0.215	0.269	30
Streptomyces sp. 62	+	A0A3D9LXQ3	167	0.215	0.325	30
Sphaerobacter thermophilus strain DSM 20745	+	D1C1V3	173	0.207	0.345	36
Kutzneria albida DSM 43870	+	W5WKJ3	164	0.205	0.283	34
Streptomyces vietnamensis GIMV4.0001	+	A0A0B5I9B2	160	0.201	0.286	32
Streptomyces viridochromogenes	+	A0A0L8K704	166	0.195	0.274	29
Cystobacter fuscus DSM 52655	-	A0A250IWY0	154	0.195	0.394	27
Streptomyces bottropensis ATCC 25435	+	M3F484	161	0.19	0.3	29
Nocardioides iriomotensis NBRC 105384	+	A0A4Q5J010	152	18.80%	0.319	24
Methylomicrobium alcaliphilum	-	G4T3L1	147	0.187	0.31	19
Archangium violaceum Cb vi76	-	A0A084SGS8	148	0.186	0.322	21
Chloroflexi bacterium GWC2_73_18	-	A0A1F8LMI0	155	0.181	0.306	25
Nocardia mexicana DSM 44952	+	A0A370GIR3	161	0.179	29.9%	35
Gammaproteobacteria bacterium HGW	-	A0A2N1ZX47	146	0.177	0.296	18
Cystobacter fuscus DSM 2262	-	S9NWQ1	137	0.176	0.271	ND
Archangium gephyra	-	A0A0L8K704	151	0.173	0.271	19
Cystobacter ferrugineus str. Cbfe23	-	A0A1L9B5J6	137	0.173	0.269	ND
Streptomyces sp. SA15	+	A0A2A2YWR6	206	0.17	0.327	30
Stigmatella erecta	-	A0A1I0JK20	162	0.168	0.252	ND
Streptomyces alboflavus str. MDJK44	+	A0A1Z1WCN3	163	0.168	0.318	27
Streptomyces sp. NWU339	+	A0A2U2Z012	205	0.165	0.322	30
Streptomyces formicae KY5	+	A0A291Q4S1	163	0.162	0.276	33
Streptomyces sp. CB02400	+	A0A1Q5L121	205	0.161	0.277	30
Streptomyces caelestis	+	A0A0M8QLY2	205	0.161	0.27	30
Pseudonocardiales bacterium YIM PH 21723	+	A0A2W6DT35	168	0.16	0.283	33
Methylomicrobium kenyense (AMO1)	-	A0A543V9V5	149	0.158	0.265	ND
Streptomyces griseoruber str. DSM 40281	+	A0A101SV50	161	0.158	0.254	29
Chloroflexi bacterium	-	A0A3A0ARB1	201	0.157	0.273	27
Thiogranum longum str. DSM 19610	-	A0A4R1H9Y2	148	0.157	0.253	21
Streptomyces fungicidicus str. TXX3120	+	A0A494UTW6	205	0.154	0.278	ND
Streptomyces toyocaensis str. NRRL 15009	+	A0A081XHD4	205	0.152	0.29	30
Streptomyces showdoensis ATCC 15227	+	A0A2P2GJ53	167	0.151	0.211	29
Enterobacter ludwigii str. P101	-	W0BV16	154	0.149	0.22	19
Stigmatella aurantiaca	-	A0A1H7HD66	162	0.149	0.246	35
Modestobacter sp. DSM 44400	+	A0A1H3KGG2	123	0.148	0.254	ND
Streptomyces radiopugnans	+	A0A1H9DCJ1	205	0.148	0.27	32
Methylomicrobium buryatense str. 5GB1C	-	A0A4P9UY52	131	0.148	0.261	ND
Vitiosangium sp. GDMCC 1.1324	-	A0A2T4VJB7	146	0.146	0.25	ND
Archangium sp. Cb G35	-	A0A1Q3H6L3	145	0.145	0.229	ND
Cellulomonas aerilata	+	A0A512DF30	174	0.144	0.245	24
Streptomyces sp. NRRL S-4	+	A0A0N1K8E7	203	0.143	0.251	30
Streptomyces silvensis ATCC 53525	+	A0A0W7X1T4	166	0.139	0.26	33
Streptomyces sp. CNZ306	+	A0A2M9A2V5	258	0.138	0.273	ND
Streptomyces dysideae sp. RV15	+	A0A124IFP4	187	0.132	0.226	36
Streptomyces regalis	+	A0A0X3UWY4	122	0.125	0.179	ND
Streptomyces sp. 13-12-16	+	A0A1X4I170	205	0.124	0.241	30
Streptoalloteichus hindustanus	+	A0A1M5GN54	161	0.121	0.222	31
Hyalangium minutum	-	A0A085VSV8	96	0.117	0.203	ND
